# Supplementary material for: Boron, nitrogen, and phosphorous ternary doped graphene aerogel with hierarchically porous structures as highly efficient electrocatalysts for oxygen reduction reaction
Source: Royal Society of Chemistry journal article supplement (doi:10.1039/c5nj03390j), 2016-01-01
Supplement: c5nj03390j1.pdf [file c5nj03390j1.pdf]

## Supporting Information

### **Boron, Nitrogen and Phosphorous Ternary Doped Graphene Aerogel with Hierarchically Porous Structures as Highly Efficient Electrocatalysts for Oxygen Reduction Reaction**

Hualin Lin,<sup>a,‡</sup> Lei Chu,<sup>a,‡</sup> Xinjing Wang,<sup>a</sup> Zhaoquan Yao,<sup>c</sup> Fan Liu,<sup>a</sup> Yani Ai,<sup>a</sup> Xiaodong Zhuang<sup>\*b</sup> and Sheng Han,<sup>\*a</sup>

*<sup>a</sup>School of Chemical and Environmental Engineering, Shanghai Institute of Technology, Haiquan Road 100, 201418, Shanghai, P. R. China  
Email: hansheng654321@sina.com*

*<sup>b</sup>School of Chemistry and Chemical Engineering, Shanghai Jiao Tong University, Dongchuan Road 800, 200240, Shanghai, P. R. China.  
Email: zhuang@sjtu.edu.cn*

*<sup>c</sup>School of Aeronautics and Astronautics, Shanghai Jiao Tong University, Dongchuan Road 800, 200240, Shanghai, P. R. China.*

*‡*These authors contributed equally to this work.

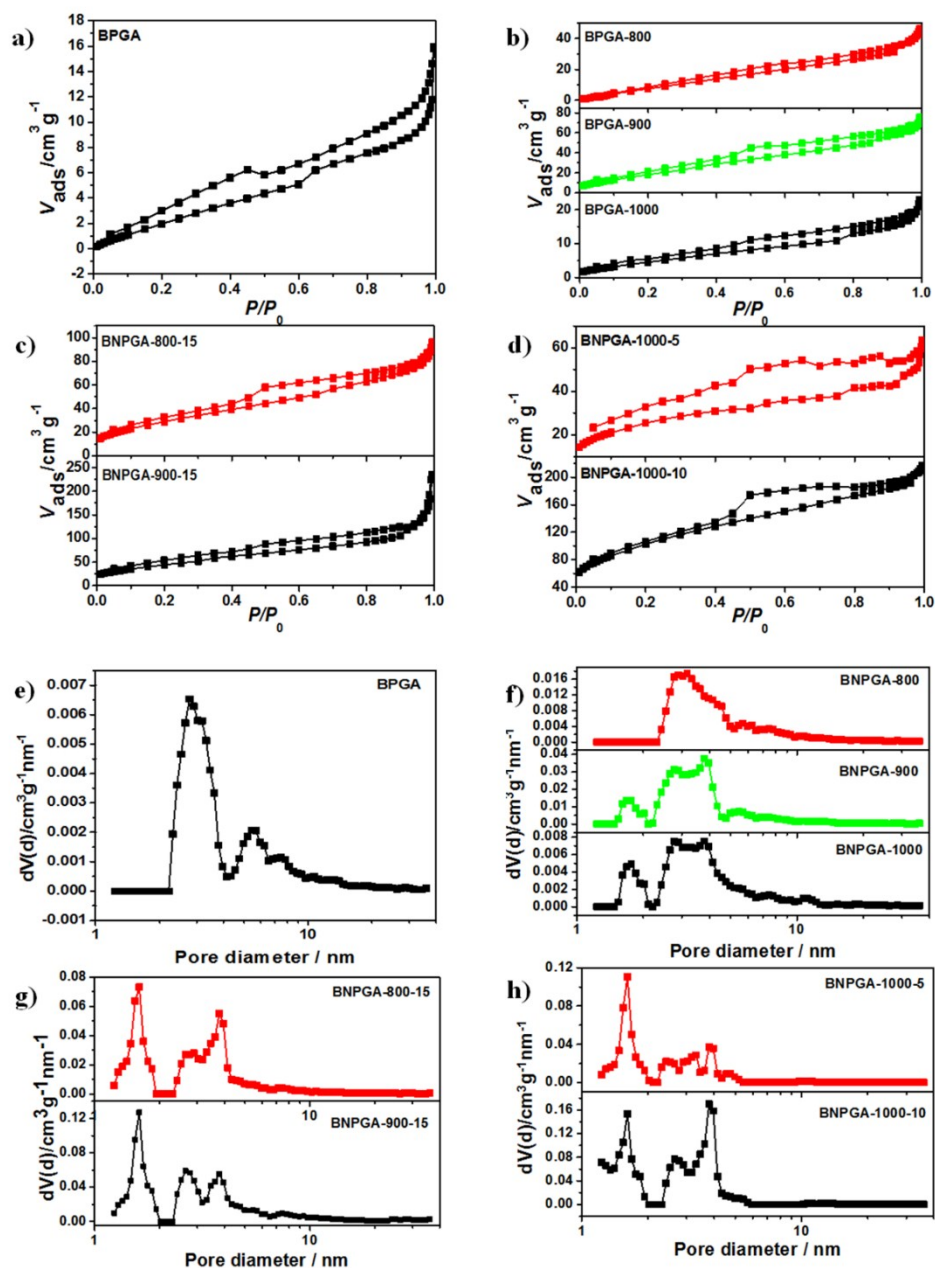

**Fig. S1.** Nitrogen adsorption-desorption isotherms (a), (c), (e), (g) and pore size distributions (b), (d), (f), (h) of BNPGA, BNPGA- $X_1$  ( $X_1=800, 900, 1000$ ), BNPGA-800-15, BNPGA-900-15 and BNPGA-1000-5, BNPGA-1000-10 measured at 77K. Detailed analysis was concluded in **Table 1**.

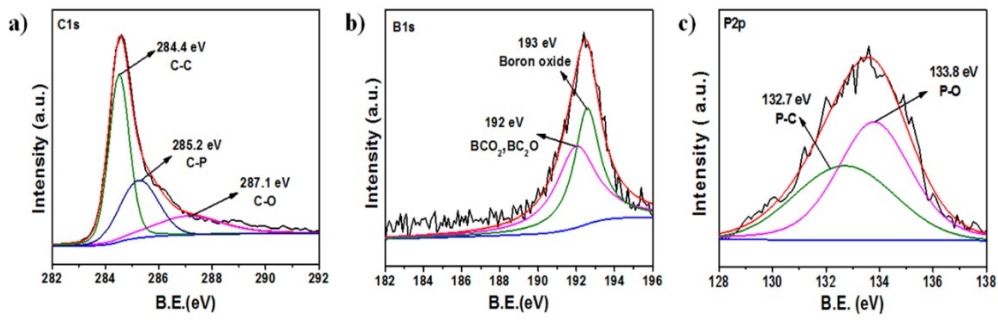

**Fig. S2.** (a) C 1s, (b) B 1s, and (c) P 2p XPS signals for BPGA

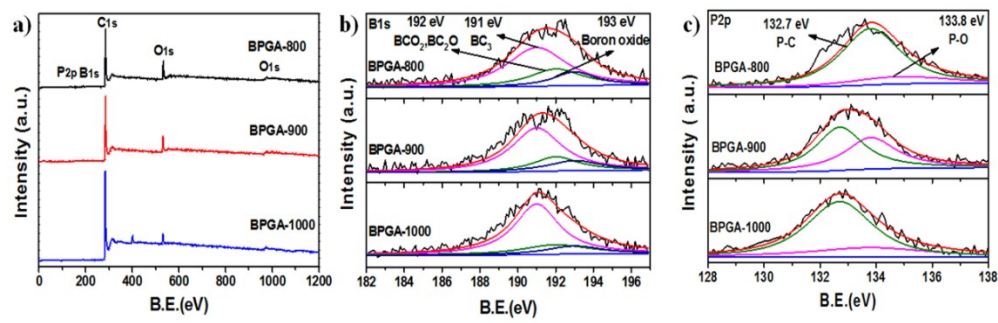

**Fig. S3** (a) XPS survey spectra and (b) B 1s, (c) P 2p XPS signals for BPGA-800, BPGA-900, BPGA-1000.

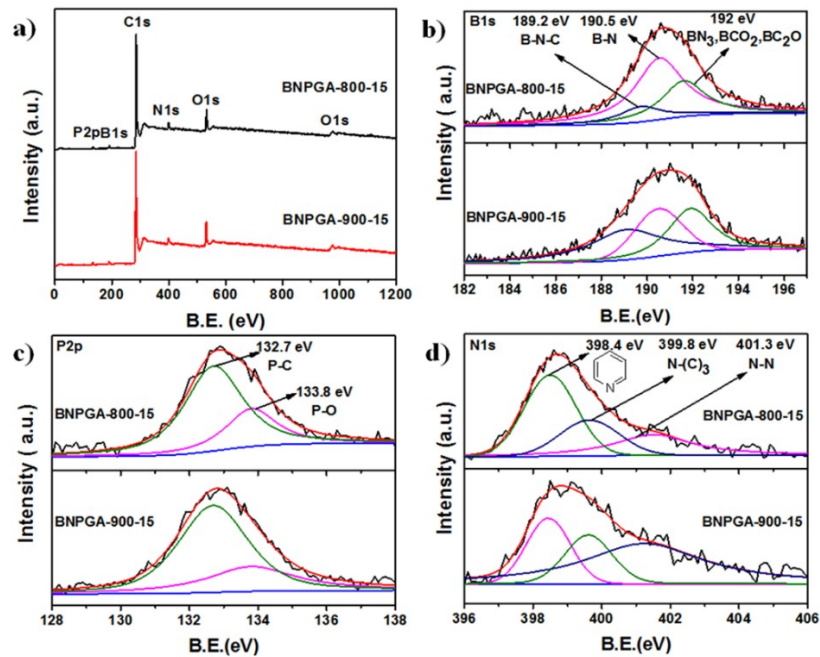

**Fig. S4** (a) XPS survey spectra and (b) B 1s, (c) P 2p, (d) N 1s XPS signals for BNPGA-800-15, BNPGA-900-15.

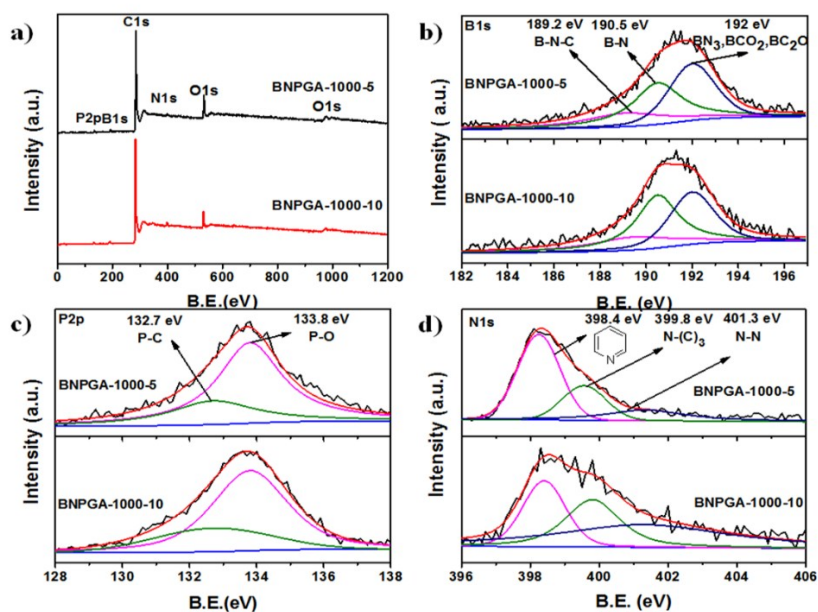

**Fig. S5** (a) XPS survey spectra and (b) B1s, (c) P2p, (d) N1s XPS signals for BNPGA-1000-5, BNPGA-1000-10.

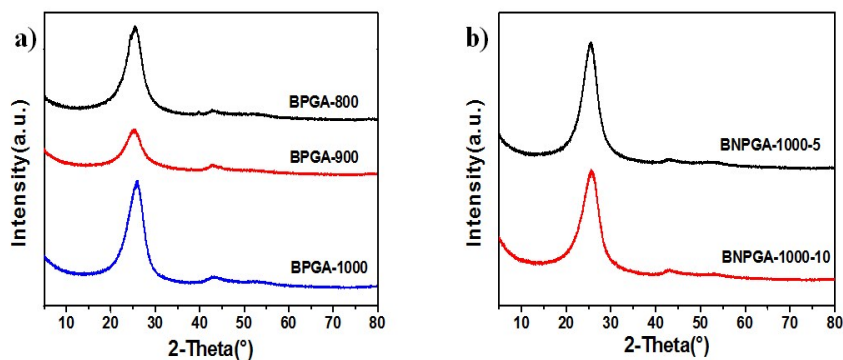

**Fig. S6** XRD patterns of (a) BPGA-800, BPGA-900, BPGA-1000 and (b) BNPGA-1000-5, BNPGA-1000-10.

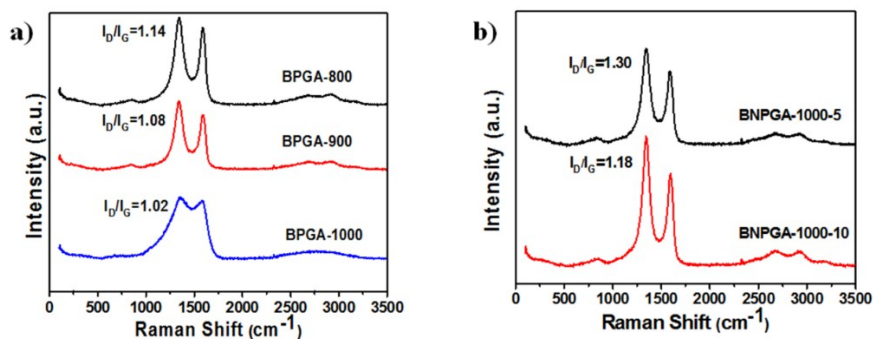

**Fig. S7** Raman spectra of (a) BPGA-800, BPGA-900, BPGA-1000 and (b) BNPGA-1000-5, BNPGA-1000-10.

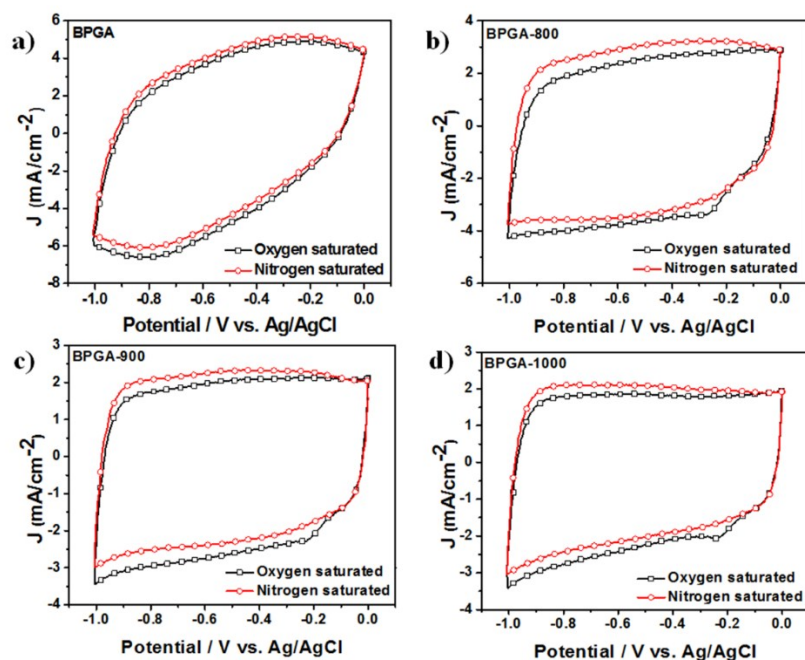

**Fig. S8** Cyclic voltammograms of **(a)** BPGA, **(b)** BPGA-800, **(c)** BPGA-900 and **(d)** BPGA-1000 at a scan rate of  $100 \text{ mV s}^{-1}$  in  $\text{O}_2$  and  $\text{N}_2$ -saturated  $0.1\text{M}$  KOH solution.

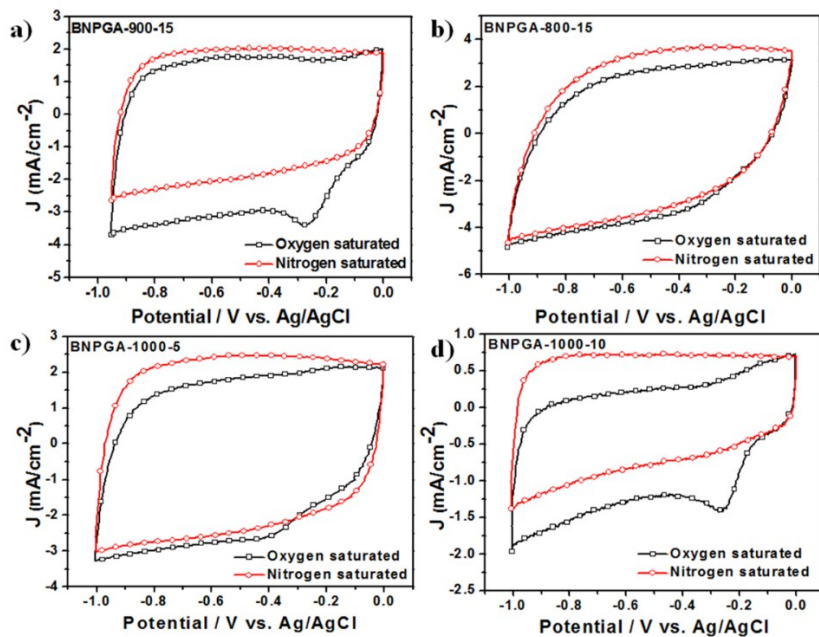

**Fig. S9** Cyclic voltammograms of **(a)** BNPGA-800-15, **(b)** BNPGA-900-15, **(c)** BNPGA-1000-5 and **(d)** BNPGA-1000-10 at a scan rate of  $100 \text{ mV s}^{-1}$  in  $\text{O}_2$  and  $\text{N}_2$ -saturated  $0.1 \text{ M}$  KOH solution.

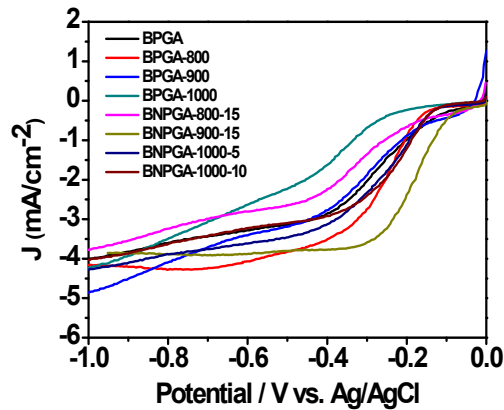

**Fig. S10** LSVs of BPGA, BPGA-X, BNPGA-X-Y and commercial Pt/C at a rotation rate of 1600 rpm with a scan rate of  $10 \text{ mV s}^{-1}$  in  $\text{O}_2$ -saturated 0.1 M KOH solution

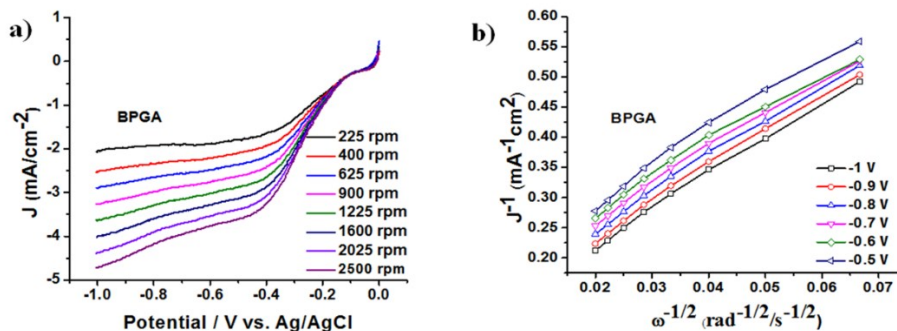

**Fig. S11 (a)** RDE voltammograms of BNPGA at different rotating speeds with a scan rate of  $10 \text{ mV s}^{-1}$  in  $\text{O}_2$ -saturated 0.1 M KOH solution. **(b)** Koutecky–Levich plots of  $j^{-1}$  versus  $\omega^{-1/2}$  of the BNPGA at potentials of -0.5, -0.6, -0.7, -0.8, -0.9 and -1.0 V.

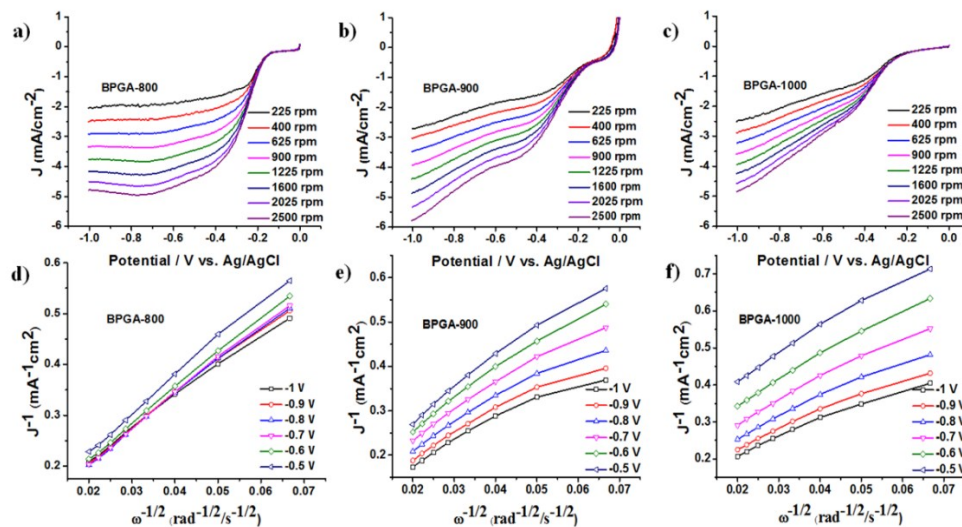

**Fig. S12 (a), (b), (c)** RDE voltammograms of BPGA-800, BPGA-900 and BPGA-1000 at different rotating speeds with a scan rate of  $10 \text{ mV s}^{-1}$  in  $\text{O}_2$ -saturated 0.1 M KOH solution. **(d), (e), (f)** Koutecky–Levich plots of  $j^{-1}$  versus  $\omega^{-1/2}$  of the BPGA-800, BPGA-900 and BPGA-1000 at potentials of -0.5, -0.6, -0.7, -0.8, -0.9 and -1.0 V.

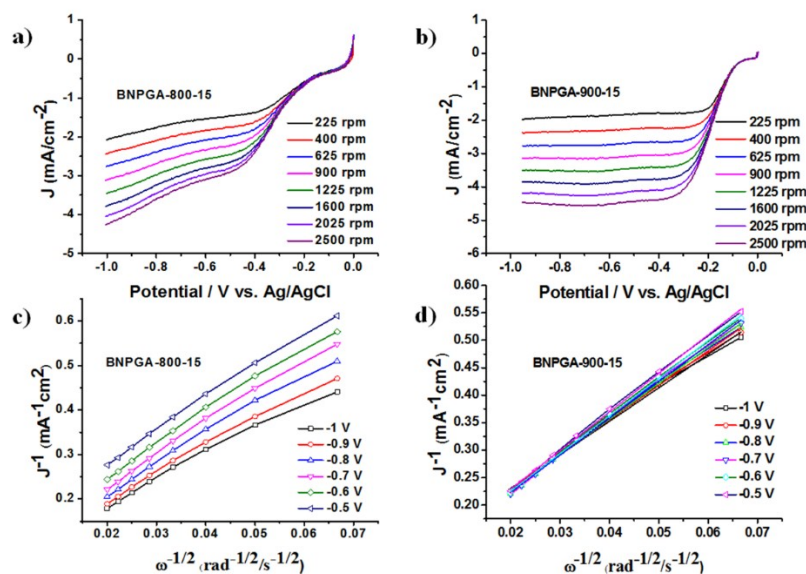

**Fig. S13** (a), (b) RDE voltammograms of BNPGA-800-15 and BNPGA-900-15 at different rotating speeds with a scan rate of  $10 \text{ mV s}^{-1}$  in  $\text{O}_2$ -saturated  $0.1 \text{ M KOH}$  solution. (c), (d) Koutecky–Levich plots of  $j^{-1}$  versus  $\omega^{-1/2}$  of the BNPGA-800-15 and BNPGA-900-15 at potentials of  $-0.5$ ,  $-0.6$ ,  $-0.7$ ,  $-0.8$ ,  $-0.9$  and  $-1.0 \text{ V}$ .

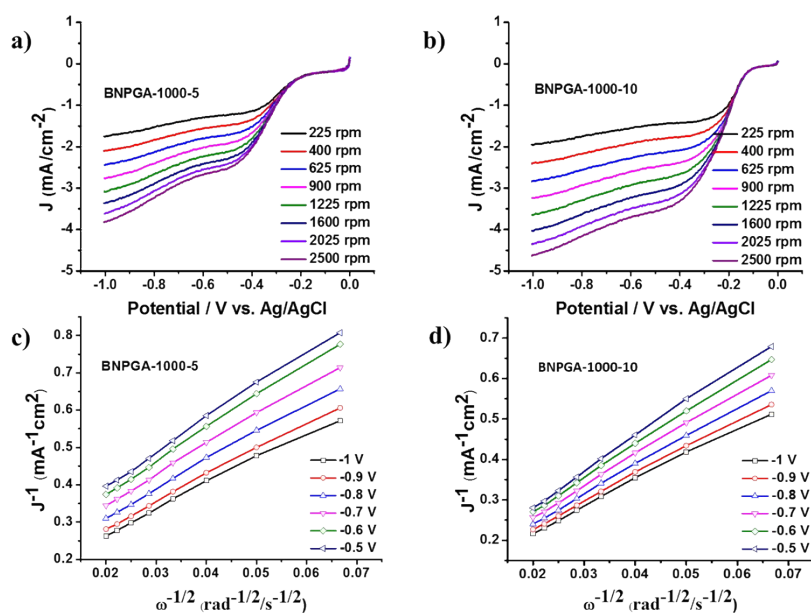

**Fig. S14** (a), (b) RDE voltammograms of BNPGA-1000-5 and BNPGA-1000-10 at different rotating speeds with a scan rate of  $10 \text{ mV s}^{-1}$  in  $\text{O}_2$ -saturated  $0.1 \text{ M KOH}$  solution. (c), (d) Koutecky–Levich plots of  $j^{-1}$  versus  $\omega^{-1/2}$  of the BNPGA-1000-5 and BNPGA-1000-10 at potentials of  $-0.5$ ,  $-0.6$ ,  $-0.7$ ,  $-0.8$ ,  $-0.9$  and  $-1.0 \text{ V}$ .

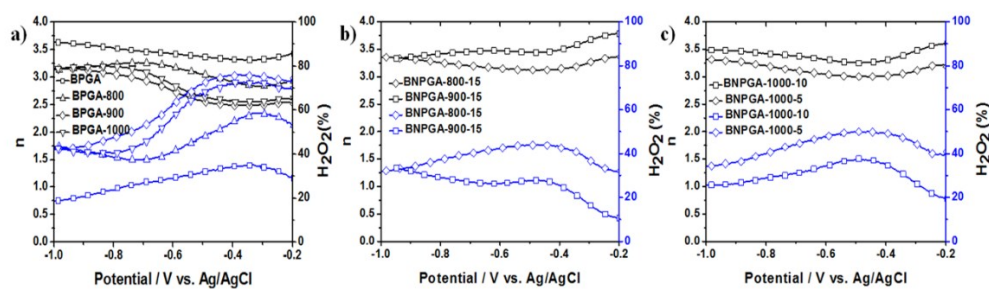

**Fig. S15** The calculated electron transfer numbers ( $n$ ) and percentage of  $H_2O_2$  of **(a)** BPGA, BPGA-800, BPGA-900, BPGA-1000, **(b)** BNPGA-800-15, BNPGA-900-15 and **(c)** BNPGA-1000-5, BNPGA-1000-10.

**Table S1.** Elemental analysis based on XPS analysis.

| Samples       | C                  | O     | B    | N    | P    | B/C  | N/C  | P/C  |
|---------------|--------------------|-------|------|------|------|------|------|------|
|               | Weight content (%) |       |      |      |      |      |      |      |
| BPGA          | 70.99              | 20.73 | 4.90 | -    | 3.38 | 0.07 | -    | 0.05 |
| BPGA-800      | 77.42              | 12.10 | 5.39 | -    | 5.09 | 0.07 | -    | 0.07 |
| BPGA-900      | 82.01              | 10.29 | 4.02 | -    | 3.68 | 0.05 | -    | 0.04 |
| BPGA-1000     | 91.05              | 4.87  | 2.12 | -    | 1.97 | 0.02 | -    | 0.02 |
| BNPGA-800-15  | 82.26              | 8.03  | 3.81 | 2.83 | 3.07 | 0.05 | 0.03 | 0.04 |
| BNPGA-900-15  | 81.97              | 8.15  | 4.05 | 2.17 | 3.66 | 0.05 | 0.03 | 0.04 |
| BNPGA-1000-15 | 77.70              | 8.10  | 6.53 | 4.50 | 3.17 | 0.08 | 0.06 | 0.04 |
| BNPGA-1000-10 | 82.70              | 7.59  | 3.73 | 2.18 | 3.80 | 0.05 | 0.03 | 0.04 |
| BNPGA-1000-5  | 79.14              | 10.43 | 5.02 | 1.98 | 3.43 | 0.06 | 0.03 | 0.04 |
